# Supplementary material for: High Dose Convalescent Plasma in COVID-19: Results from the Randomized Trial CAPSID
Source: bioRxiv or medRxiv preprint supplement (doi:10.1101/2021.05.10.21256192), 2021-05-10
Supplement: Supplementary file [file media-2.pdf]

## The CAPSID Clinical Trial Group

### Alphabetical order

|                                                                                                                                                                                                                                  |                                                                                                                  |
|----------------------------------------------------------------------------------------------------------------------------------------------------------------------------------------------------------------------------------|------------------------------------------------------------------------------------------------------------------|
| Institute for Clinical Transfusion Medicine and Immunogenetics Ulm, German Red Cross Blood Transfusion Service Baden-Württemberg-Hessen and University Hospital Ulm and Institute of Transfusion Medicine, University of Ulm.    | Thomas Appl, Marianne Holl, Bernd Jahrsdörfer, Sixten Körper, Ramin Lotfi, Markus Rojewski, Hubert Schrezenmeier |
| Department of Anaesthesiology and Intensive Care Medicine, University Hospital Ulm, Ulm University, Ulm, Germany                                                                                                                 | Bettina Jungwirth, Manfred Weiss                                                                                 |
| Department of Nephrology and Medical Intensive Care, Charité - Universitätsmedizin Berlin, corporate member of Free University Berlin, Humboldt-Universität zu Berlin, and Berlin Institute of Health, Berlin, Germany           | Lucas Ernst, Jan-Matthias Kruse, Daniel Zickler,                                                                 |
| Department of Anaesthesiology and Intensive Care Medicine, Phillips-University Marburg, Marburg, Germany                                                                                                                         | Tilo Koch, Thomas Wiesmann, Hinnerk Wulf                                                                         |
| Clinic of Anaesthesiology, Intensive Care Medicine and Pain Therapy, University Hospital Frankfurt, Frankfurt, Germany                                                                                                           | Elisabeth Adam, Kai Zacharowski, Sebastian Zinn                                                                  |
| Institute of Virology, Charité- University Medicine Berlin, corporate member of Free University Berlin, Humboldt-Universität zu Berlin, and Berlin Institute of Health and German Centre for Infection Research, Berlin, Germany | Victor Corman, Christian Drosten, Tatjana Schwarz                                                                |
| Division of Infectious Diseases, University Hospital and Medical Center Ulm, Ulm, Germany                                                                                                                                        | Beate Grüner                                                                                                     |
| Department of Anesthesiology and Critical Care Medicine, Carl Gustav Carus University Hospital, Technische Universität Dresden, Dresden, Germany                                                                                 | Andreas Güldner, Peter Spieth                                                                                    |
| Experimental Transfusion Medicine, Technical University of Dresden, German Red Cross Blood Transfusion Service Nord-Ost gGmbH Dresden, Dresden, Germany                                                                          | Torsten Tonn                                                                                                     |
| Department of Internal Medicine V – Pneumology, Allergology, Intensive Care Medicine, Saarland University Hospital and Saarland University, Homburg, Germany                                                                     | Robert Bals, Guy Danziger, Philipp M. Lepper                                                                     |
| Institute for Clinical Hemostaseology and Transfusion Medicine Saarland University Hospital, Homburg, Germany                                                                                                                    | Hermann Eichler, Jan Pilch                                                                                       |
| Department of Internal Medicine III, Hospital of Karlsruhe, Karlsruhe, Germany                                                                                                                                                   | Martin Bentz, Mark Ringhoffer                                                                                    |
| Department of Gastroenterology, Hepatology, Pneumology and Infectious Diseases, Klinikum Stuttgart, Kriegsbergstraße 60, 70174 Stuttgart, Germany                                                                                | Gregor Paul                                                                                                      |
| Clinic of Hematology, Oncology and Palliative Care Klinikum Stuttgart, Stuttgart, Germany                                                                                                                                        | Dennis Hahn                                                                                                      |
| Clinic of Anesthesiology and Intensive Care Medicine University Medical Center of Freiburg, Germany                                                                                                                              | Johannes Kalbhenn, Julian Knörlein                                                                               |
| Medical Clinic I, Klinikum Landshut, Landshut, Germany                                                                                                                                                                           | Christian Bogner, Matthias Dollinger                                                                             |
| Department of Anesthesiology and Intensive Care Medicine, University Hospital Tübingen, Tübingen, Germany                                                                                                                        | Stefanie Prohaska, Peter Rosenberger                                                                             |
| Institute of Clinical and Experimental Transfusion Medicine, University Hospital Tübingen, Tübingen, Germany                                                                                                                     | Tamam Bakchoul                                                                                                   |
| Clinic for Anesthesiology and Surgical Intensive Care Medicine, University of Mannheim, Mannheim, Germany                                                                                                                        | Thomas Kirschning, Jörg Krebs                                                                                    |
| Institute of Immunology and Transfusion Medicine, University Hospital Greifswald, Greifswald, Germany                                                                                                                            | Andreas Greinacher, Thomas Thiele                                                                                |
| Institute of Epidemiology and Medical Biometry, Ulm University, Ulm, Germany                                                                                                                                                     | Benjamin Mayer                                                                                                   |
| Institute of Transfusion Medicine and Immunology, German Red Cross Blood Transfusion Service Baden-Württemberg-Hessen, Medical Faculty of Medicine Mannheim, Heidelberg, University Mannheim, Germany                            | Harald Klüter, Patrick Wuchter,                                                                                  |
| Institute of Transfusion Medicine and Immunohematology, German Red Cross Blood Transfusion Service Baden-Württemberg – Hessen, Frankfurt, Germany                                                                                | Veronika Brixner, Kay Hourfar, Michael Schmidt, Erhard Seifried                                                  |
